# Supplementary material
Source: ML conference proceedings conference paper supplement (https://openreview.net/forum?id=BqUdRP8i9e9)

# MNIST

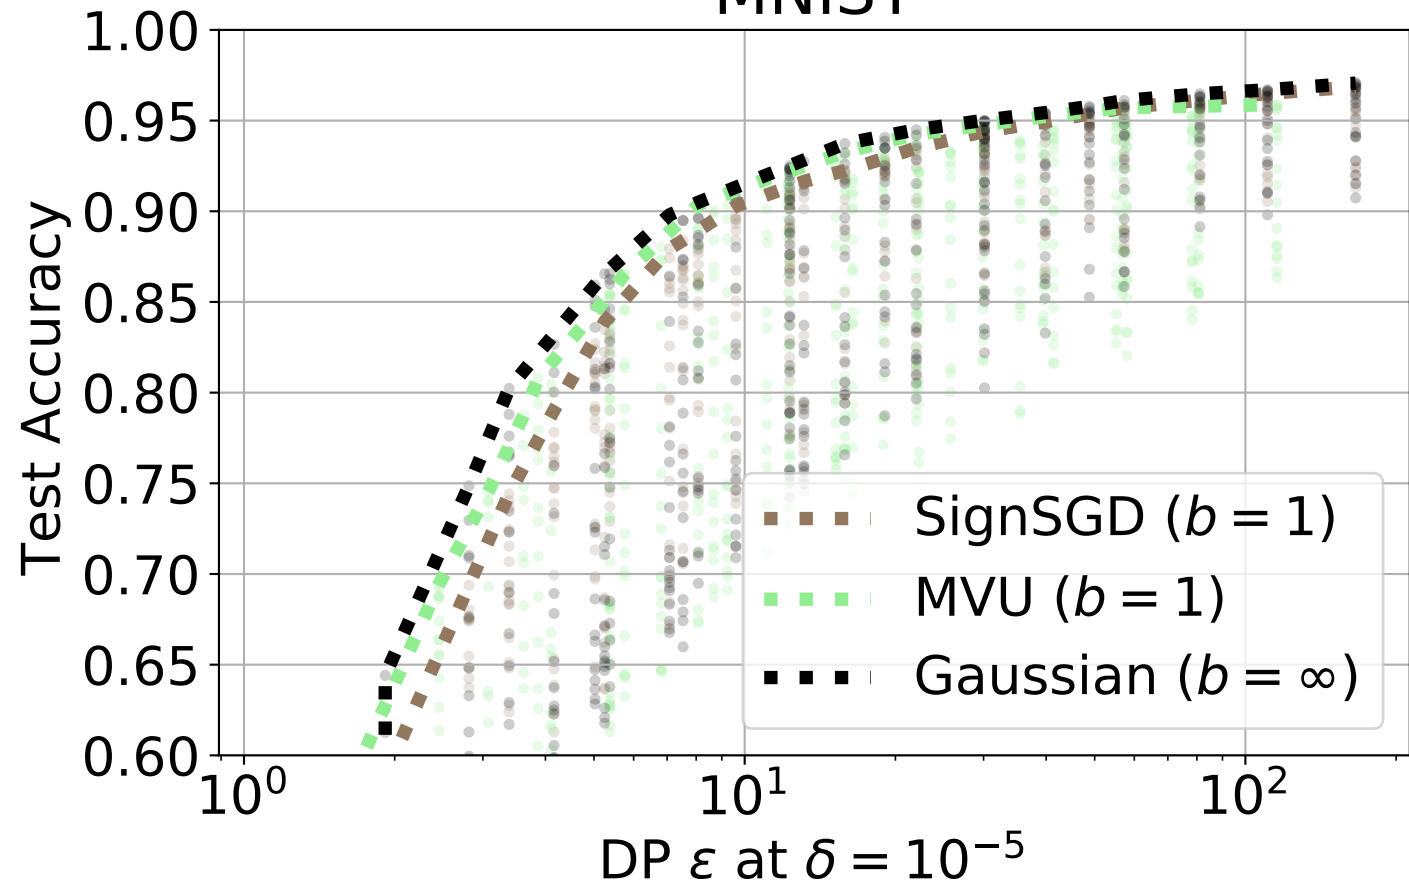

Supplement: supplementary_material [file attachment]

$\epsilon = 1$ 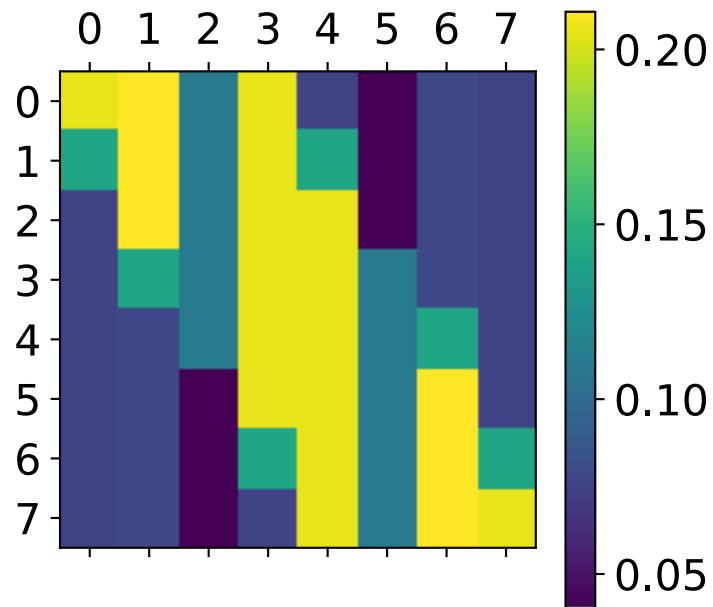 $\epsilon = 3$ 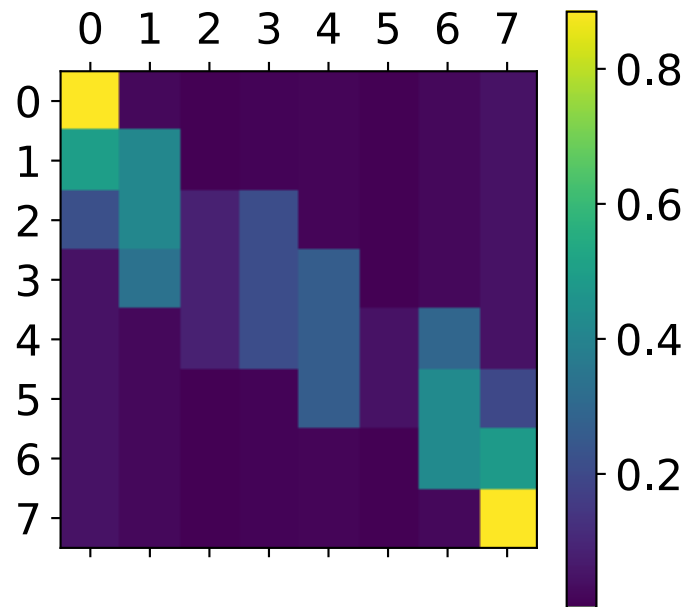 $\epsilon = 5$ 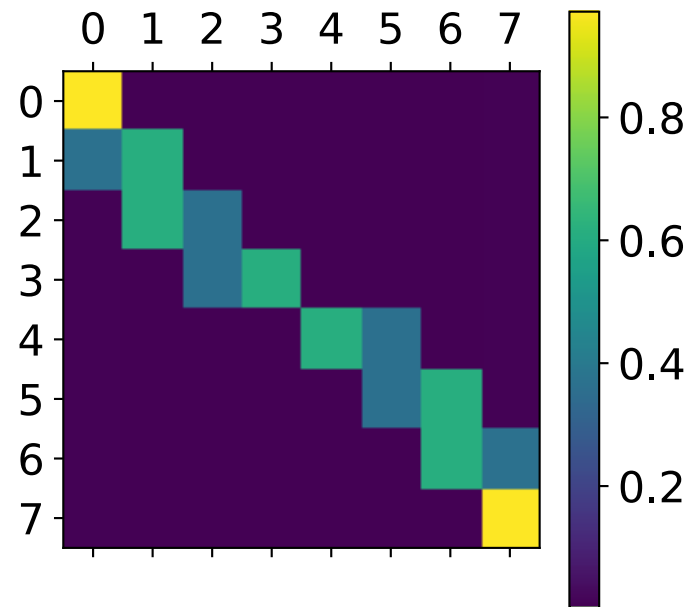 $\epsilon = 10$ 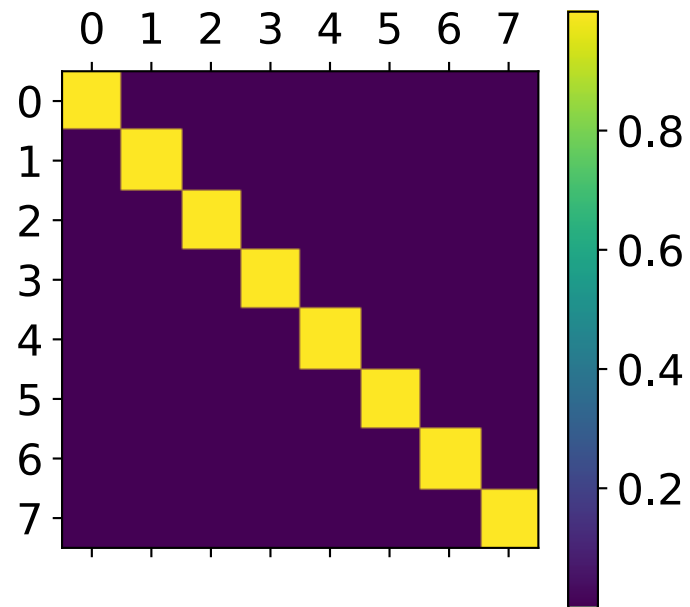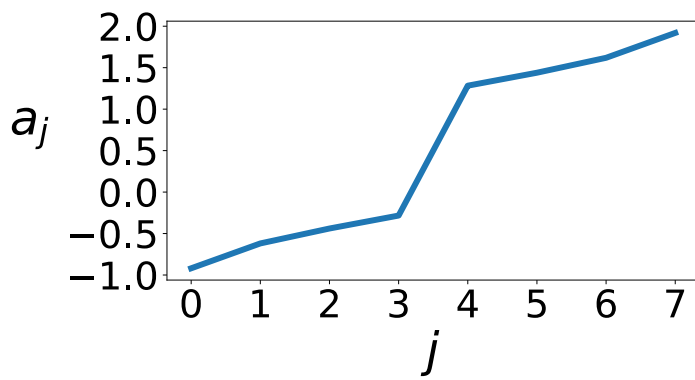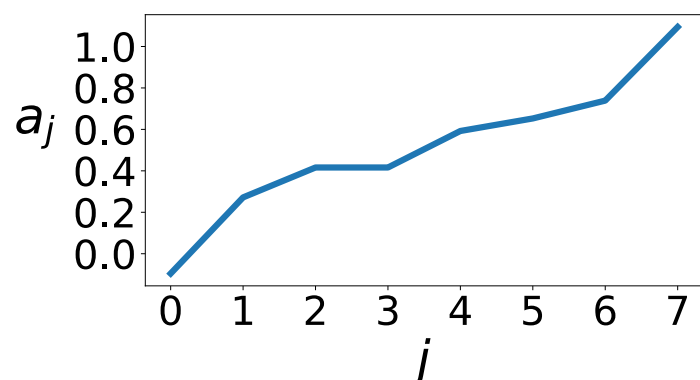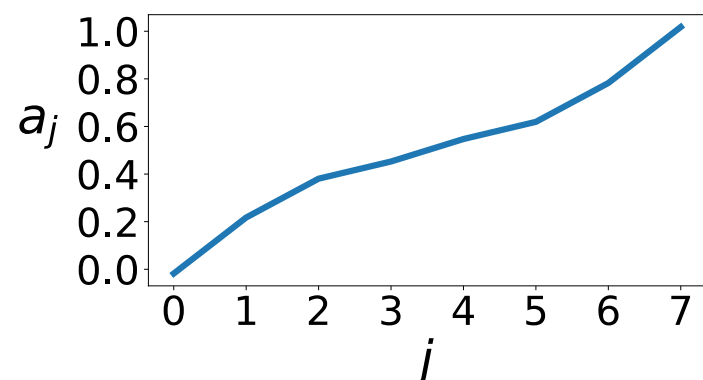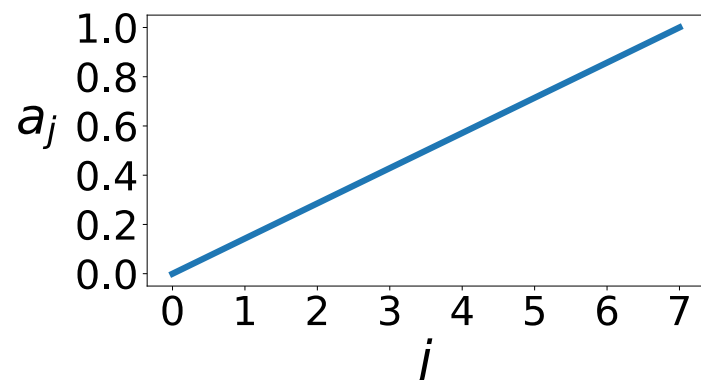

Supplement: supplementary_material [file attachment]

$\epsilon = 1$ 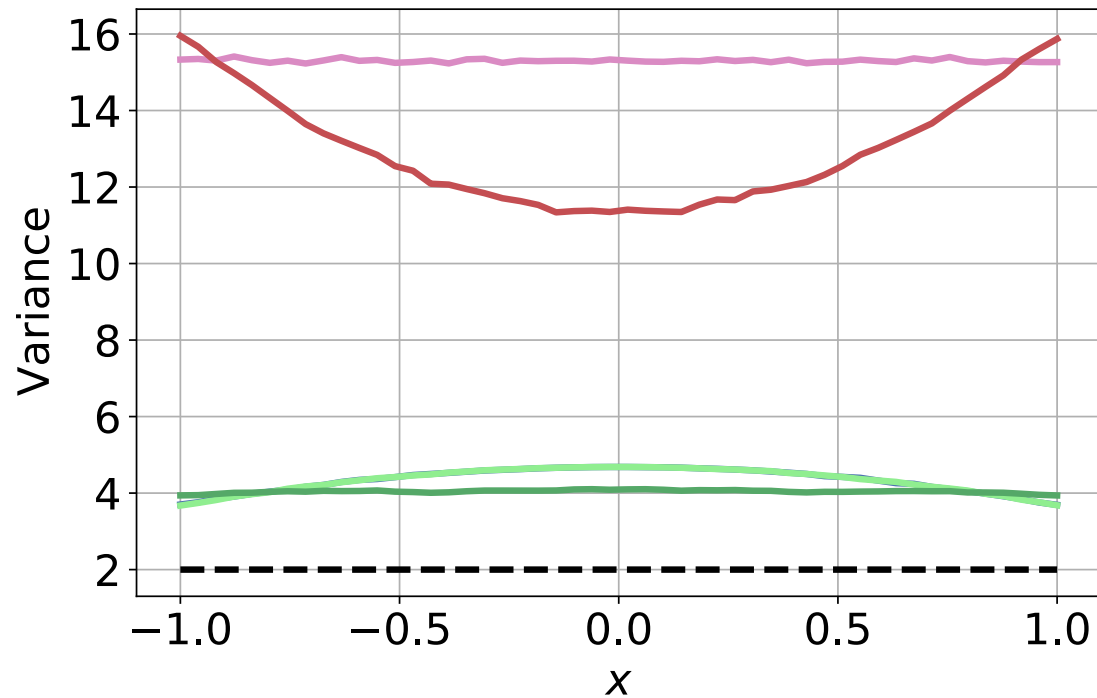 $\epsilon = 3$ 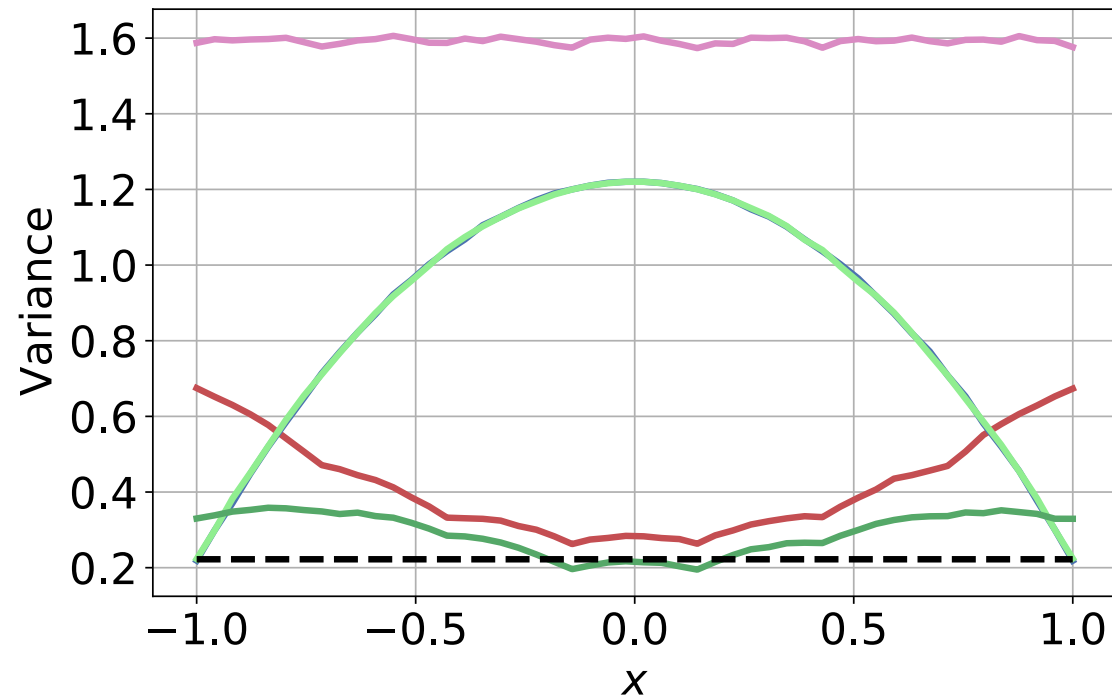 $\epsilon = 5$ 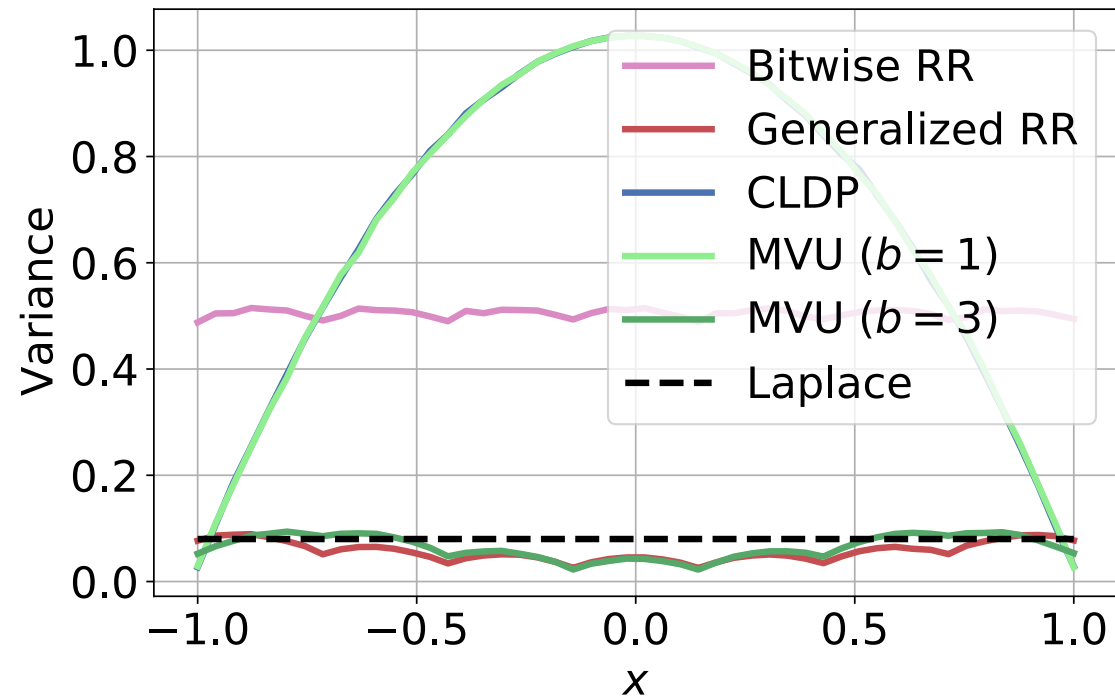

Supplement: supplementary_material [file attachment]

$\epsilon = 1$ 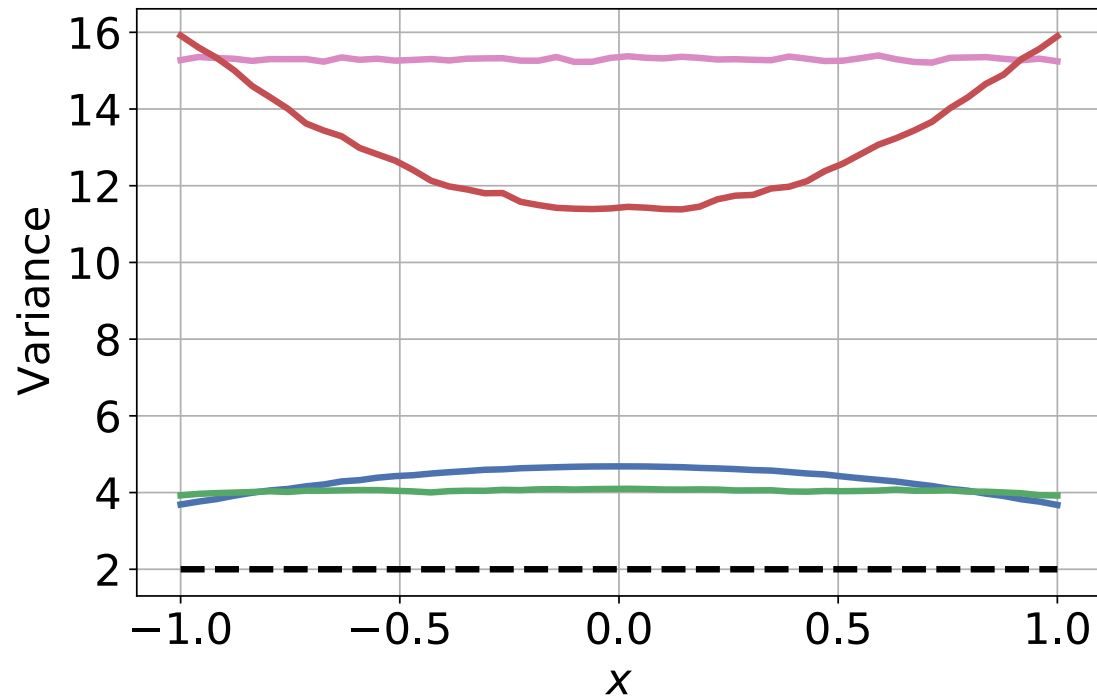 $\epsilon = 3$ 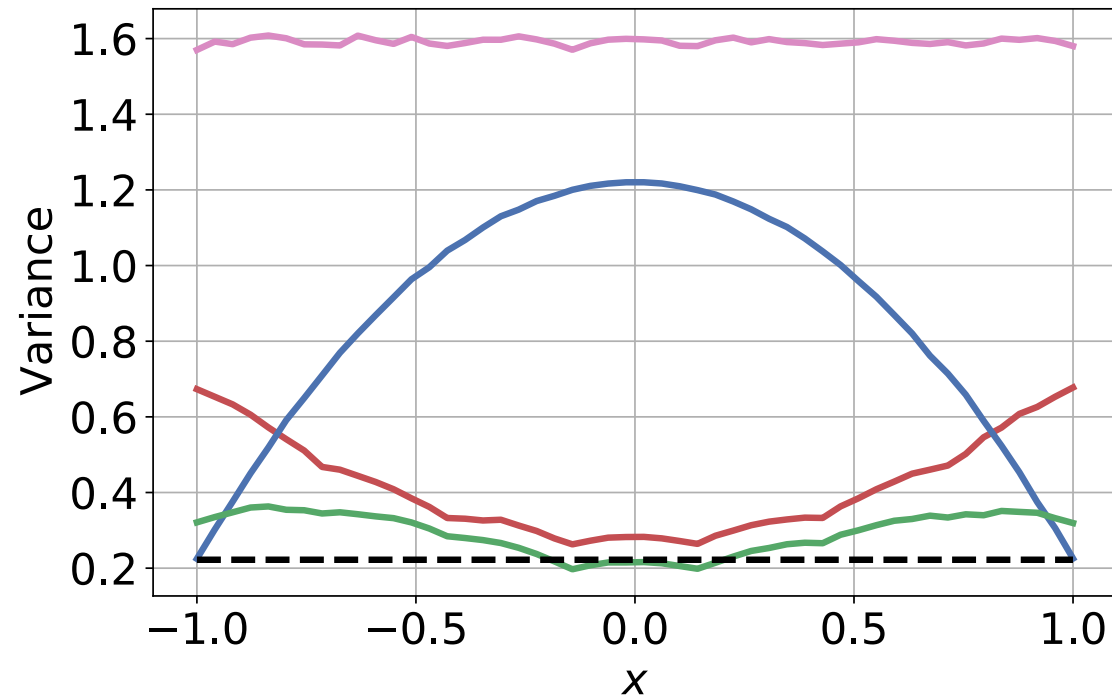 $\epsilon = 5$ 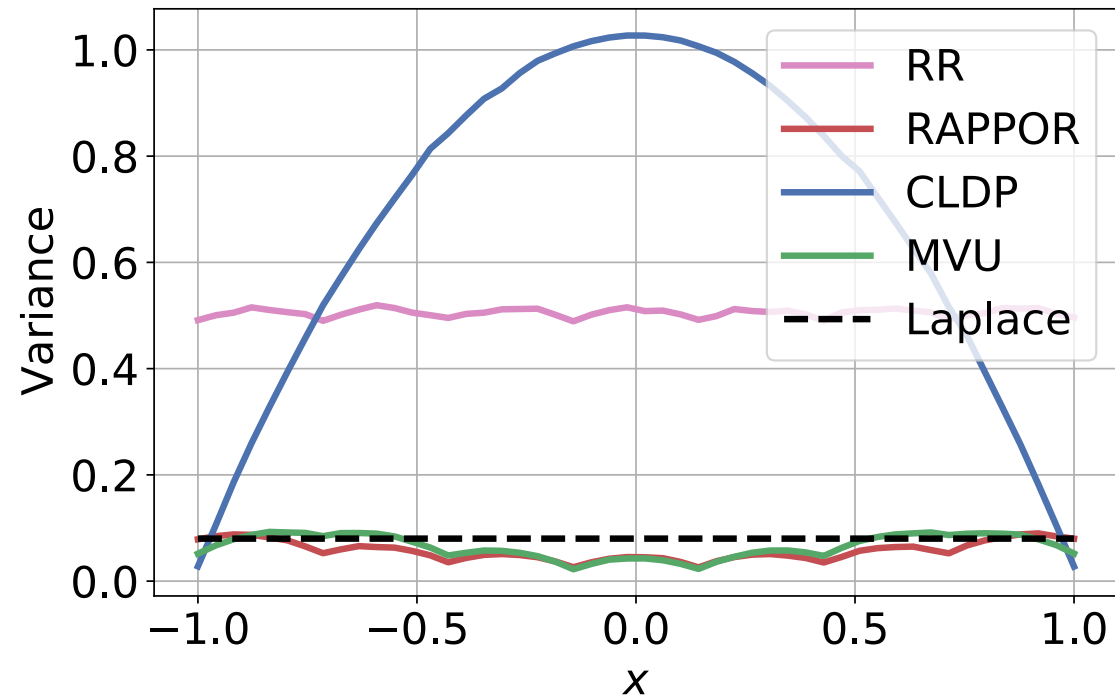

Supplement: supplementary_material [file attachment]

$L_1, d = 128$

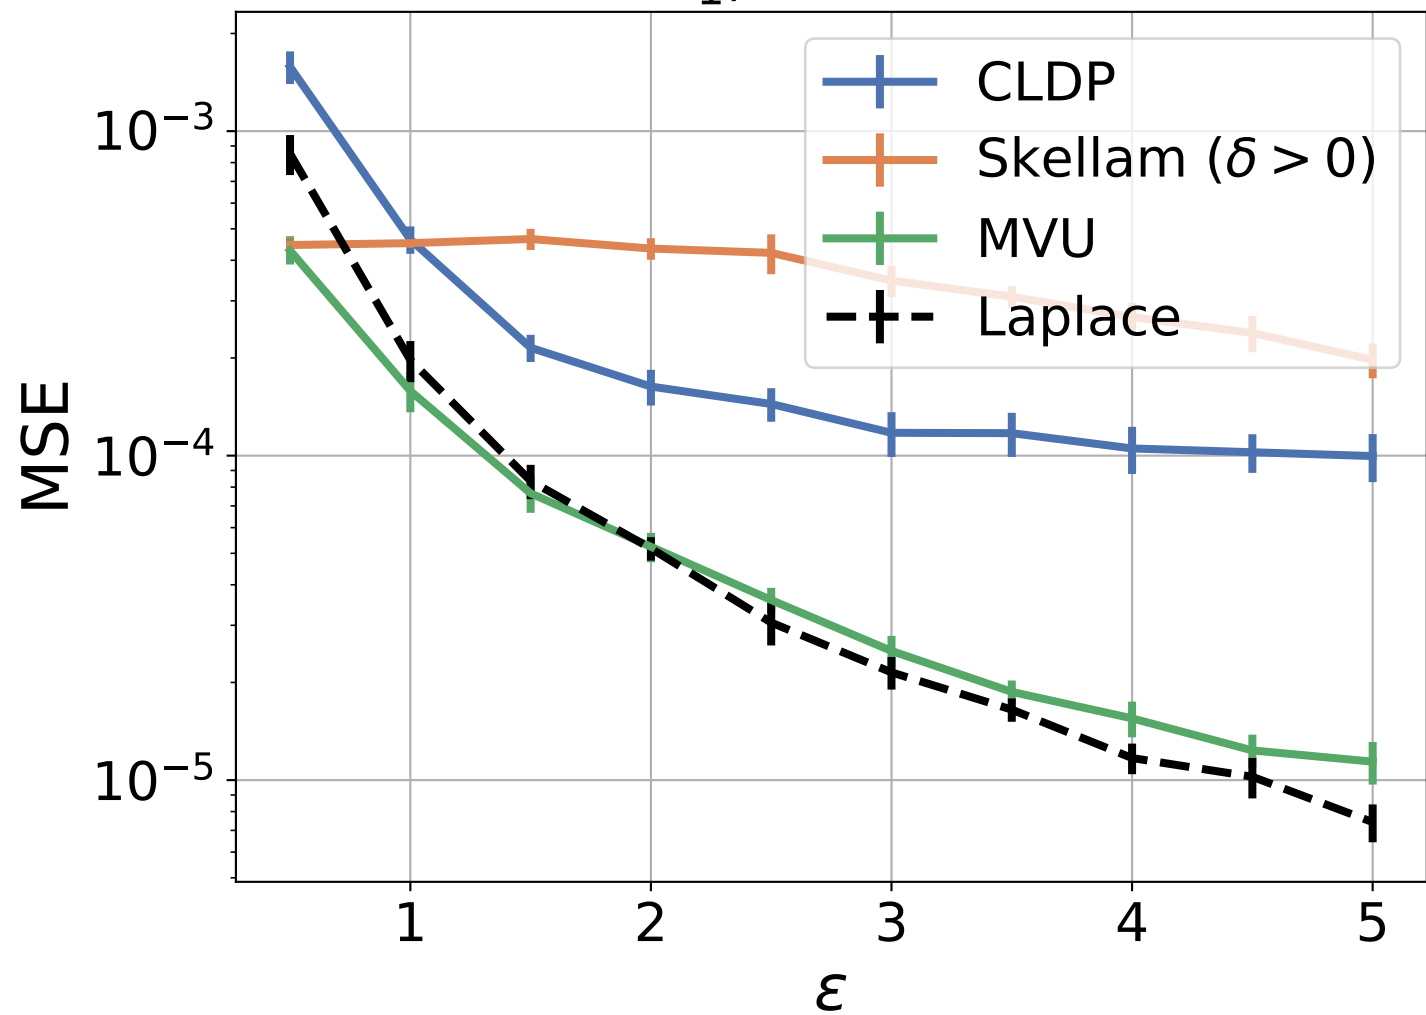

Supplement: supplementary_material [file attachment]

$$L_\infty, d = 1$$

MSE

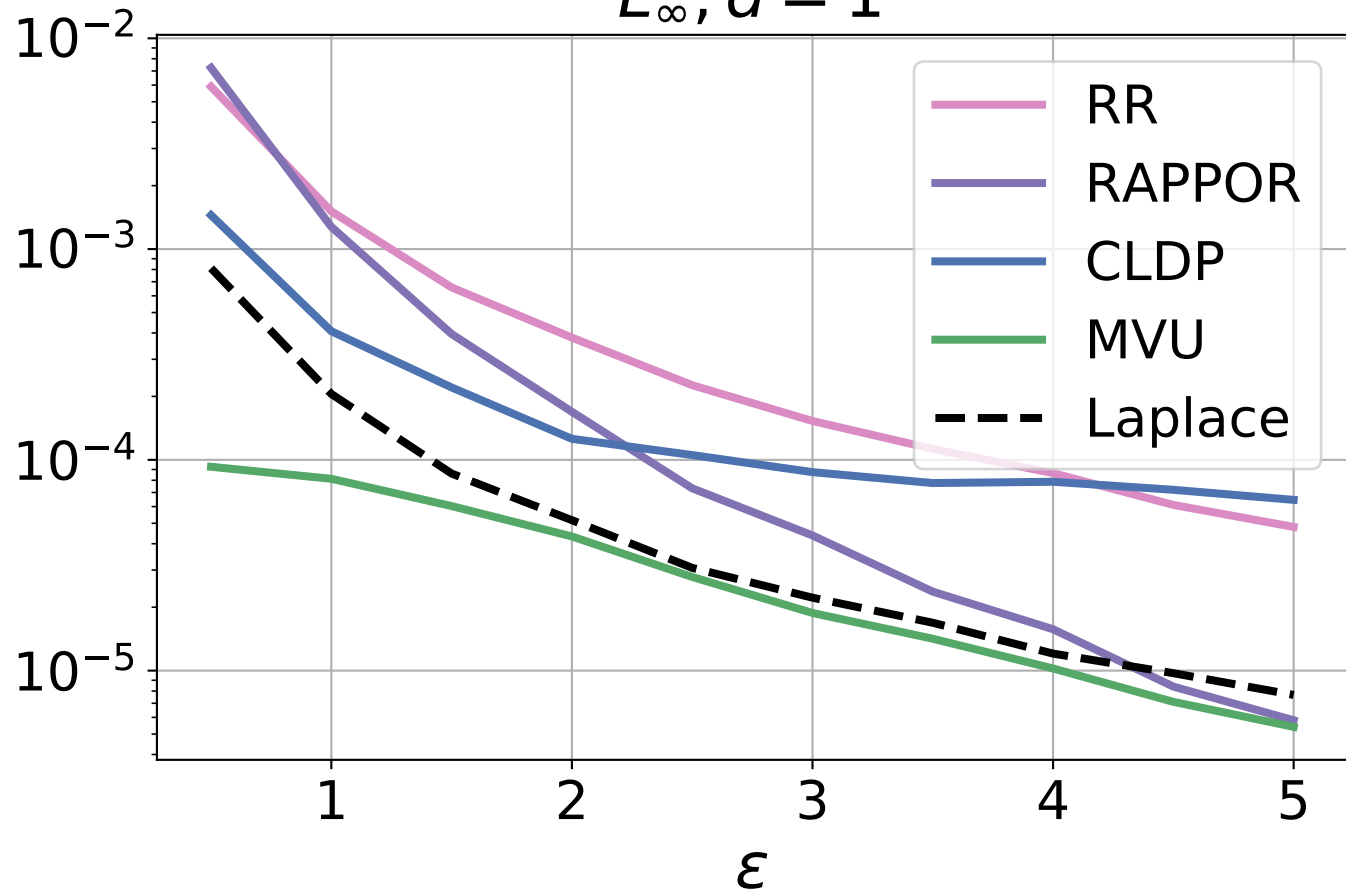

Supplement: supplementary_material [file attachment]

# CIFAR-10

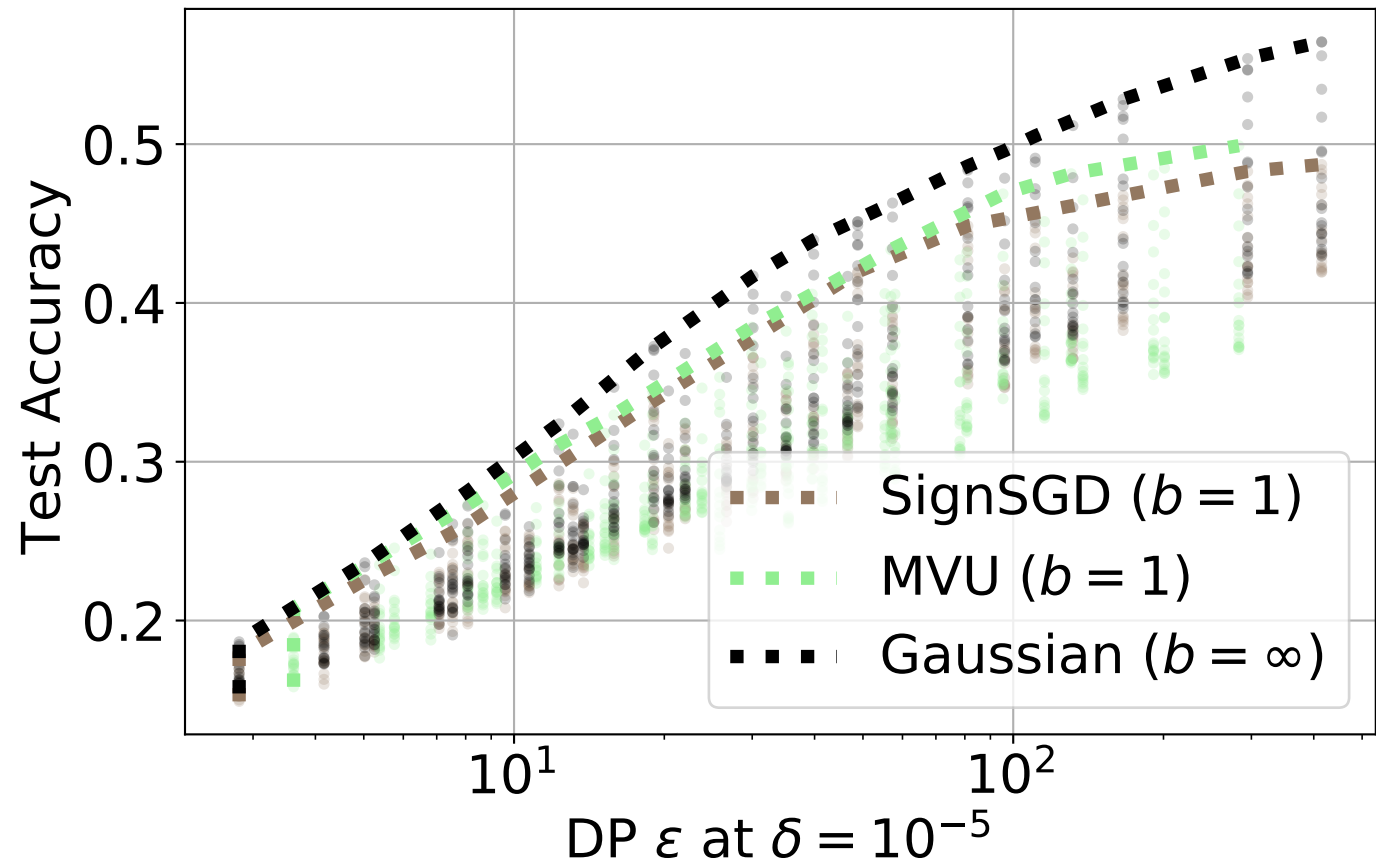

Supplement: supplementary_material [file attachment]

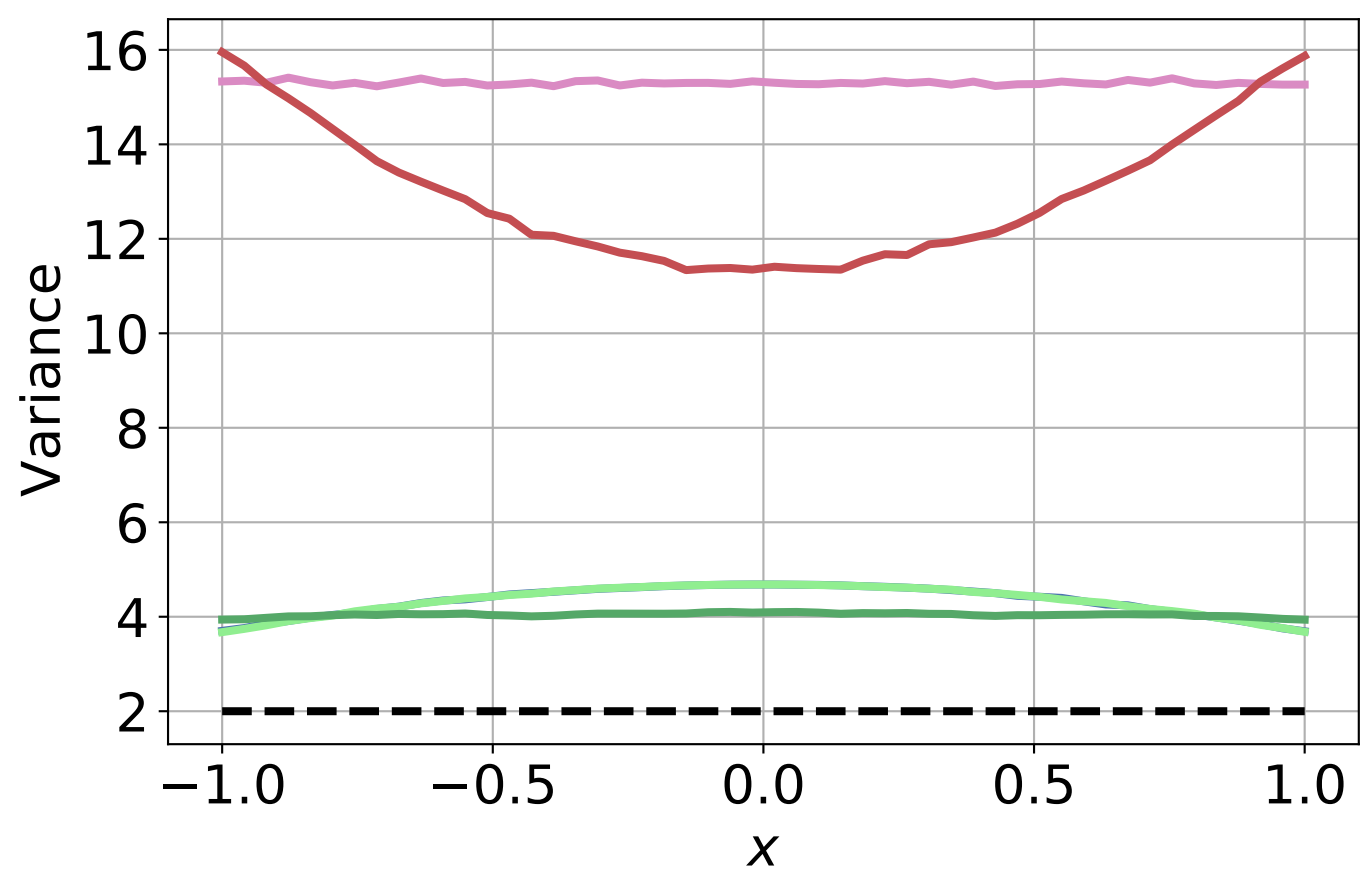

Supplement: supplementary_material [file attachment]

# MNIST ConvNet

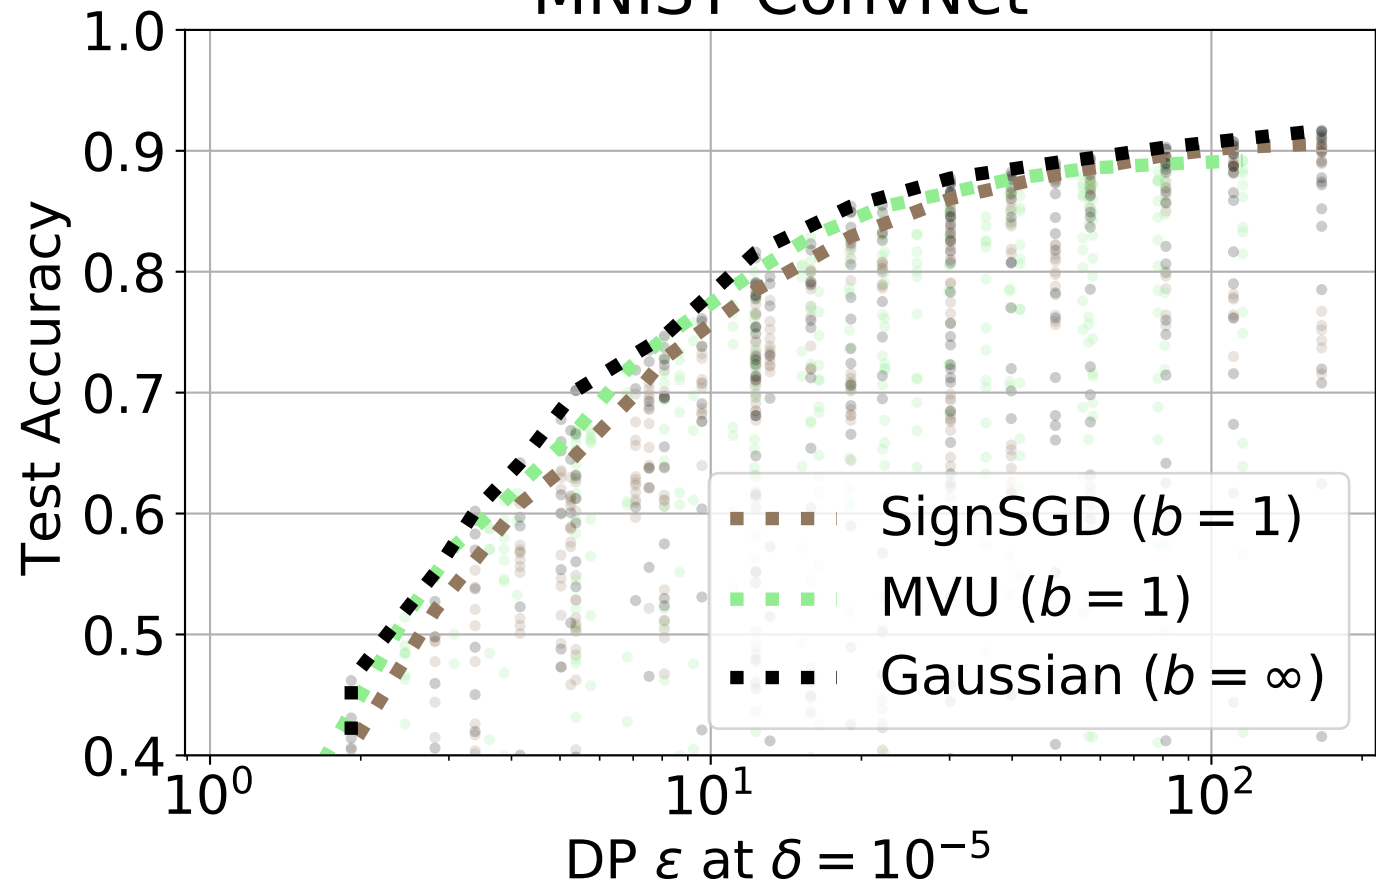

Supplement: supplementary_material [file attachment]

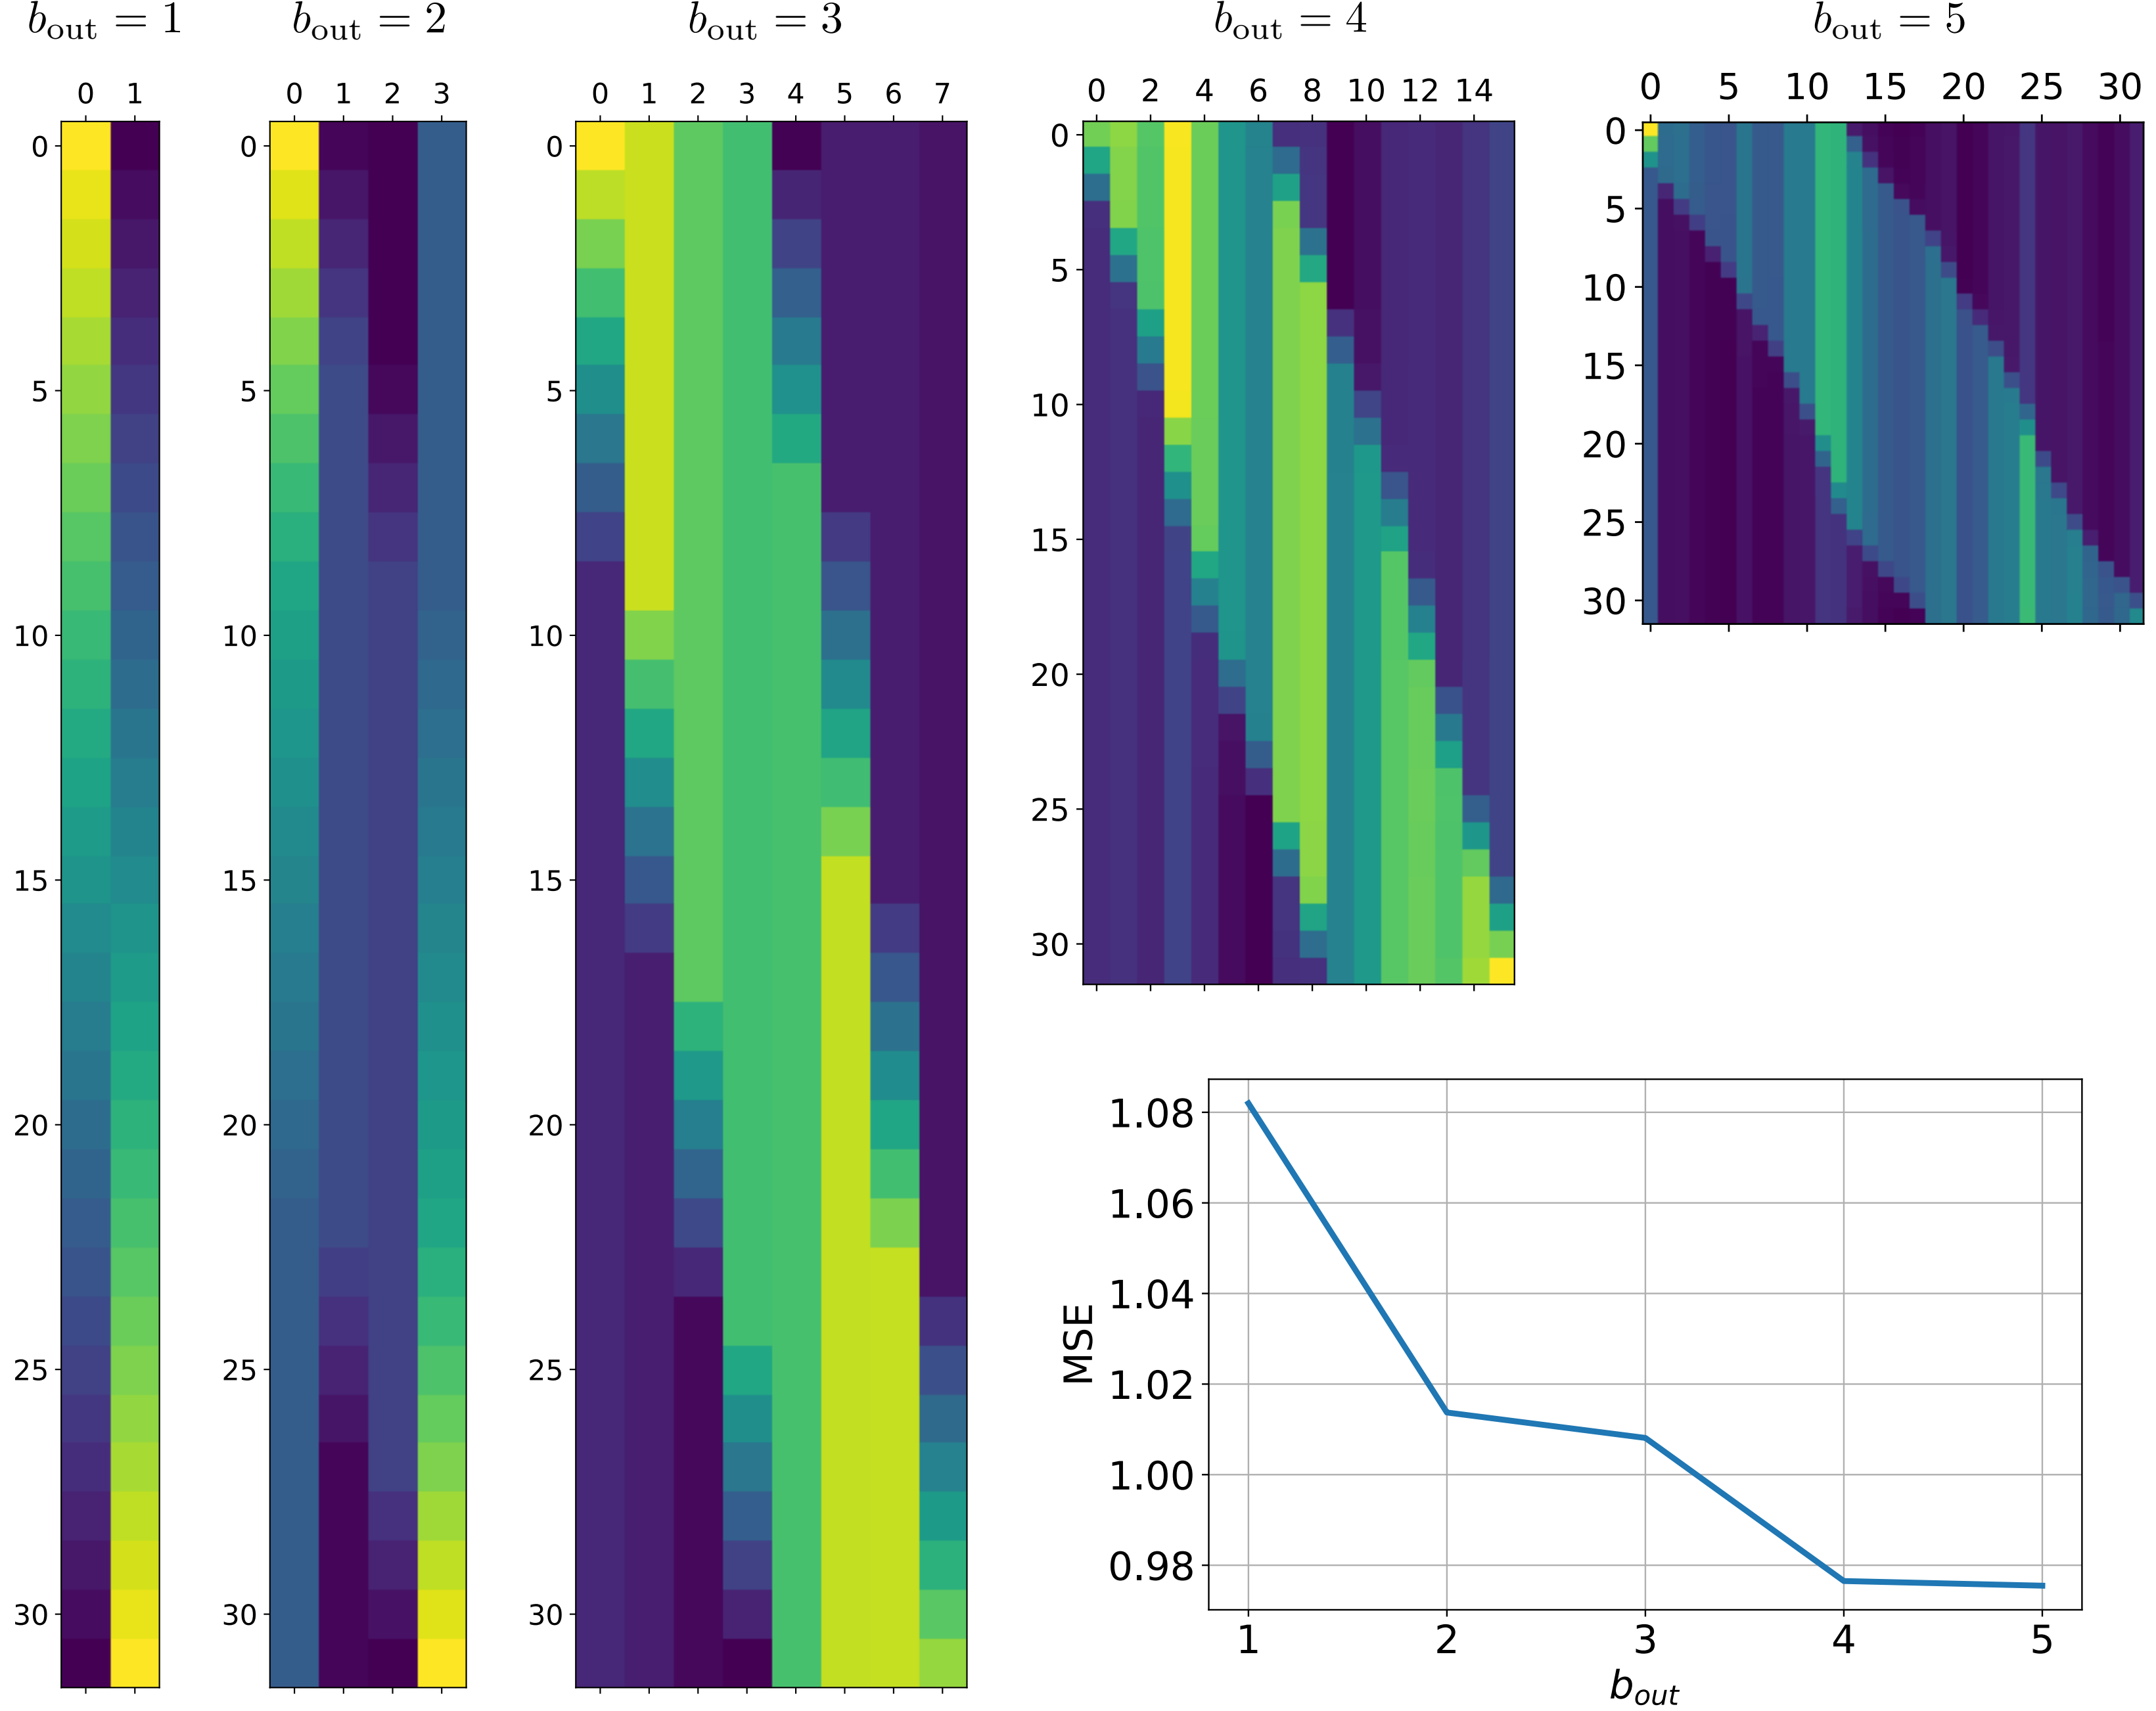

Supplement: supplementary_material [file attachment]

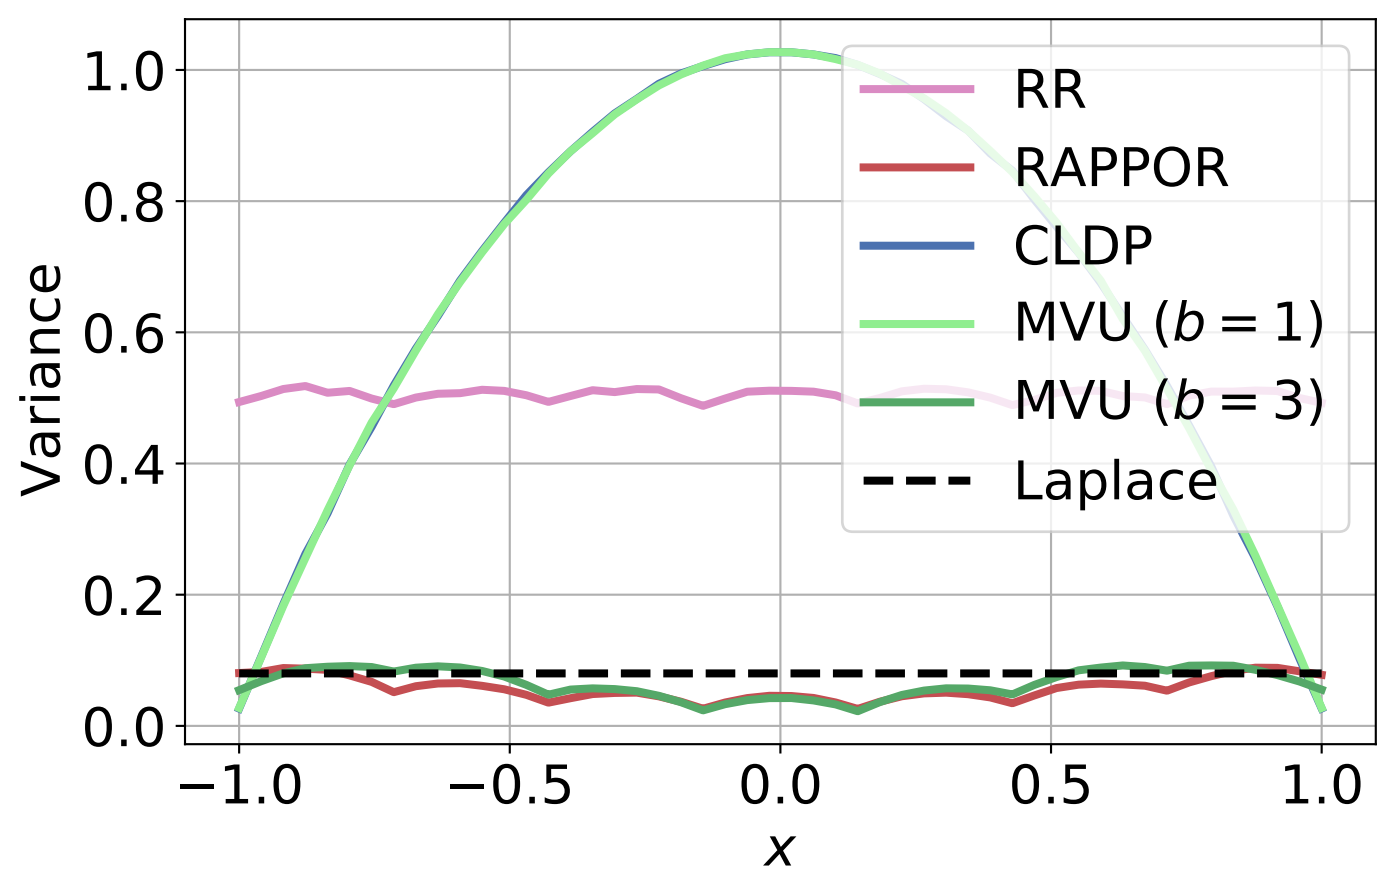

Supplement: supplementary_material [file attachment]

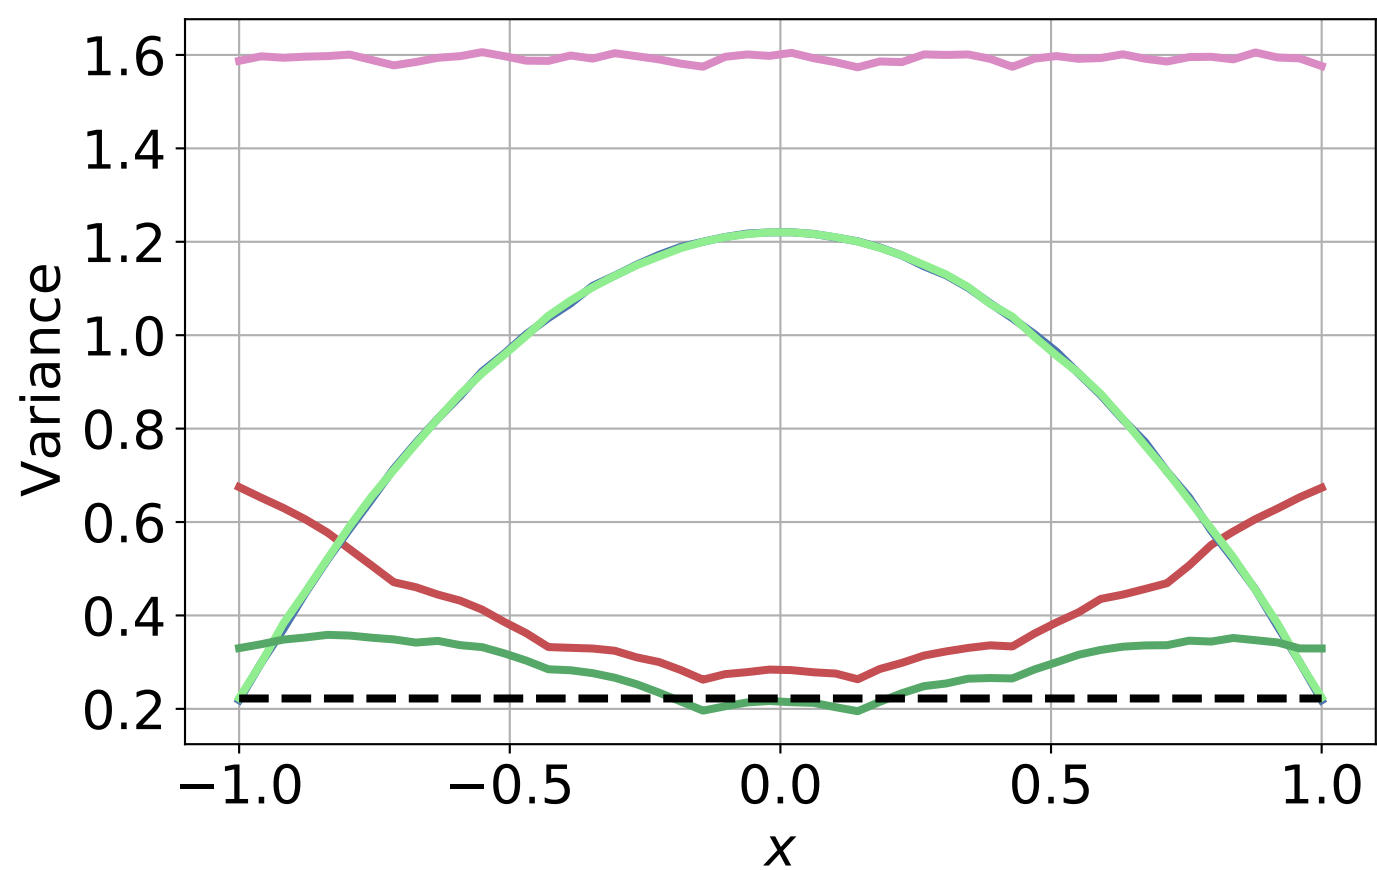

Supplement: supplementary_material [file attachment]

$L_2, d = 128$

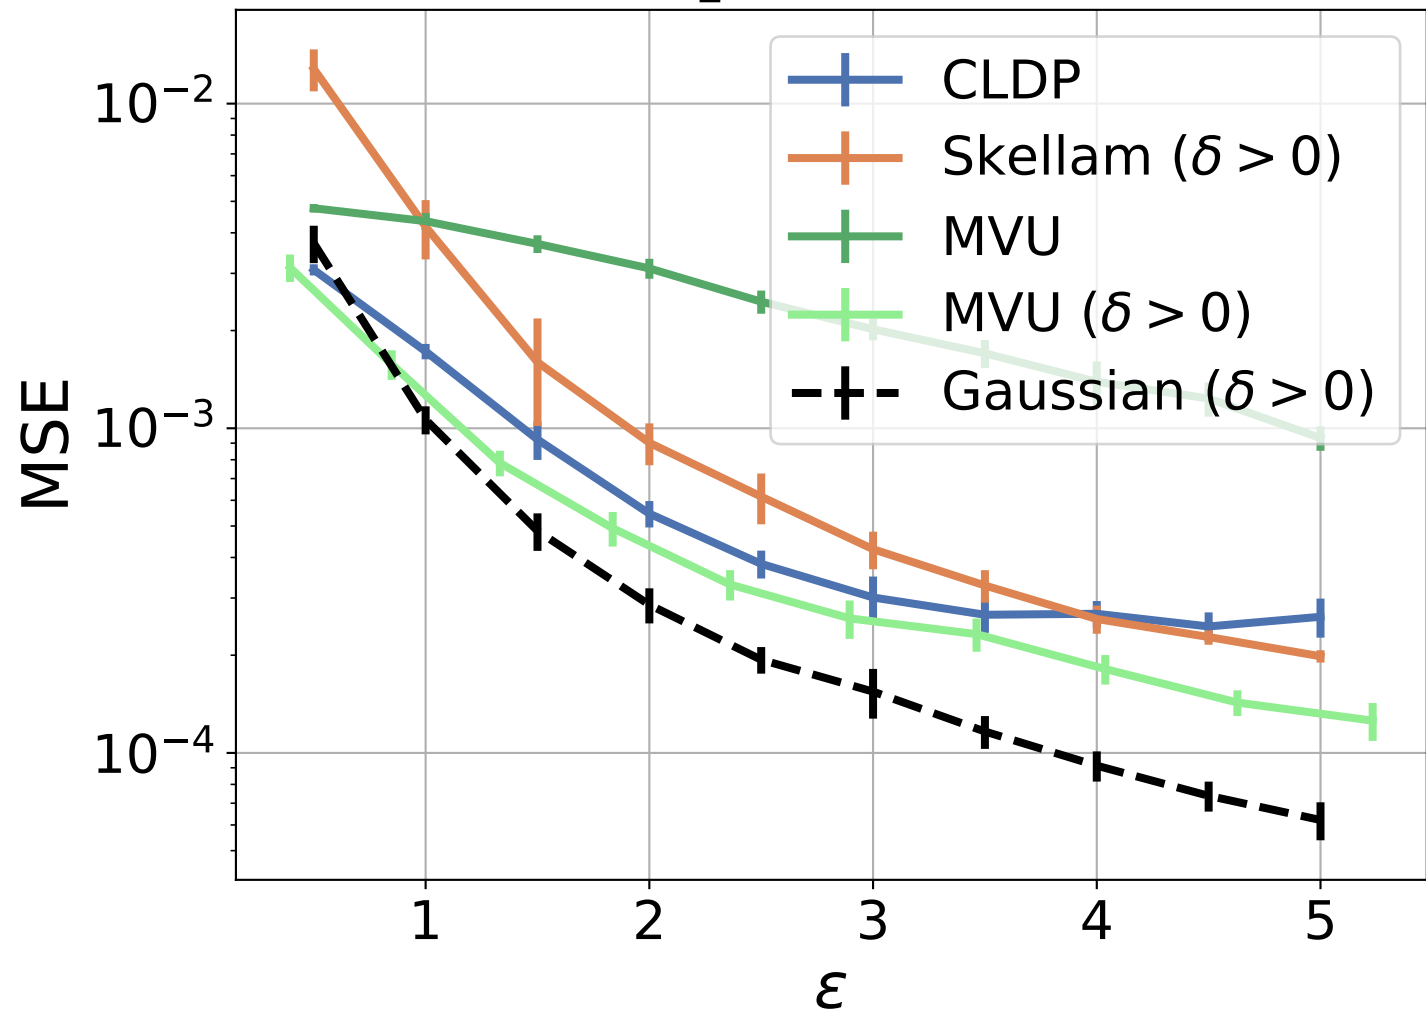

Supplement: supplementary_material [file attachment]

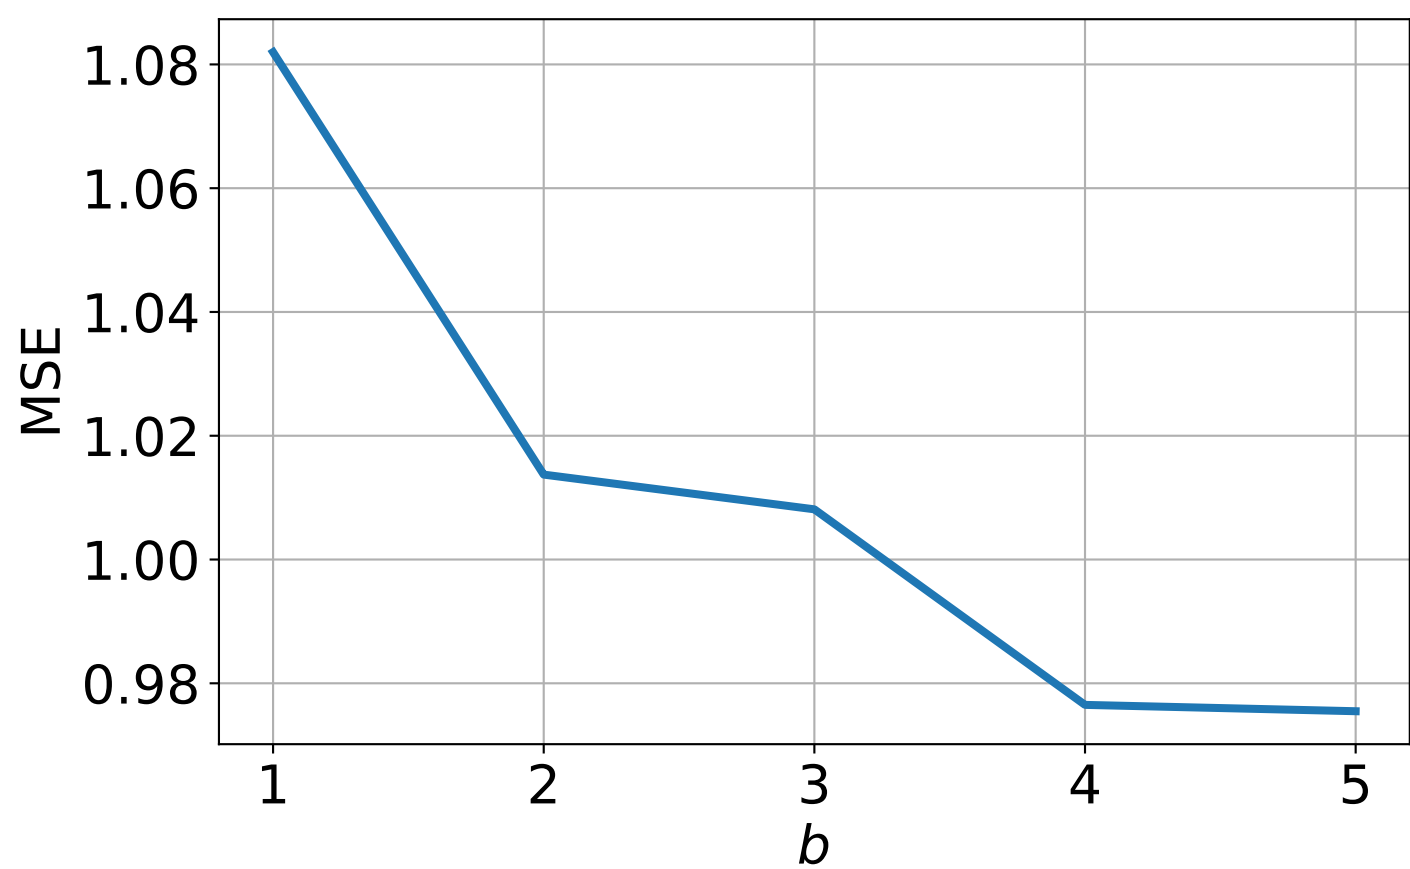

Supplement: supplementary_material [file attachment]
